# Supplementary material for: Age-dependent hormesis-like effects of the synthetic cannabinoid CP55940 in C57BL/6 mice
Source: Springer Nature journal article supplement (doi:10.1038/s41514-020-0045-7), 2020-07-06

# Supplemental Figure 1 – Experimental Timeline

## Acclimation Phase 1

1

2

3

- Weight
- Temperature (IR + Rectal)

## Acclimation Phase 2

4

5

6

- Weight
- Temperature (IR + Rectal)
- Vehicle Injection (IP)
- 60m Rest
- **Temperature (IR + Rectal)**

## Testing Battery

7

- Weight
- Temperature (IR + Rectal)
- Vehicle Injection (IP)
- 30m Rest
- **Open Field (30-60m)**
- **60m Temperature (IR + Rectal)**
- **Hot Plate**

# Supplemental Figure 2 - Baseline Measures During Vehicle Acclimation

| Measure | Baseline Weight |       |        |       | Baseline Rectal Temperature |       |        |       | Change in Rectal Temperature |       |        |       | Baseline Skin/Pelage (IR) Temperature |       |        |       | Change in Skin/Pelage (IR) Temperature |       |        |       |
|---------|-----------------|-------|--------|-------|-----------------------------|-------|--------|-------|------------------------------|-------|--------|-------|---------------------------------------|-------|--------|-------|----------------------------------------|-------|--------|-------|
|         | Male            |       | Female |       | Male                        |       | Female |       | Male                         |       | Female |       | Male                                  |       | Female |       | Male                                   |       | Female |       |
| Age     | Young           | Old   | Young  | Old   | Young                       | Old   | Young  | Old   | Young                        | Old   | Young  | Old   | Young                                 | Old   | Young  | Old   | Young                                  | Old   | Young  | Old   |
| Mean    | 27.77           | 32.81 | 22.62  | 27.81 | 37.24                       | 36.86 | 37.49  | 36.88 | -0.17                        | -0.28 | -0.18  | -0.11 | 30.43                                 | 29.94 | 30.75  | 29.54 | -0.30                                  | -0.12 | -0.34  | -0.03 |
| S.E.M.  | 0.06            | 0.12  | 0.10   | 0.21  | 0.02                        | 0.03  | 0.04   | 0.04  | 0.02                         | 0.04  | 0.04   | 0.06  | 0.03                                  | 0.06  | 0.06   | 0.06  | 0.03                                   | 0.04  | 0.06   | 0.07  |
| n=      | 655             | 510   | 144    | 144   | 655                         | 510   | 144    | 144   | 655                          | 510   | 144    | 144   | 655                                   | 510   | 144    | 144   | 654                                    | 510   | 144    | 144   |

# Supplemental Figure 3 – Effects of CP55940 and AM630 coadministration in Young Males

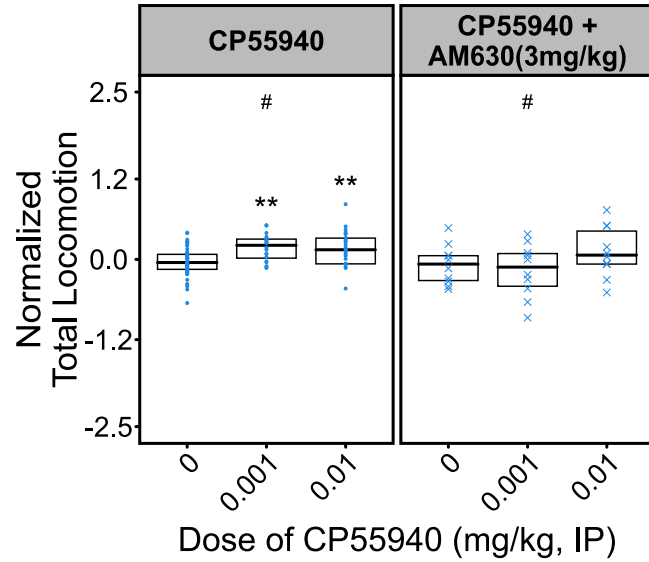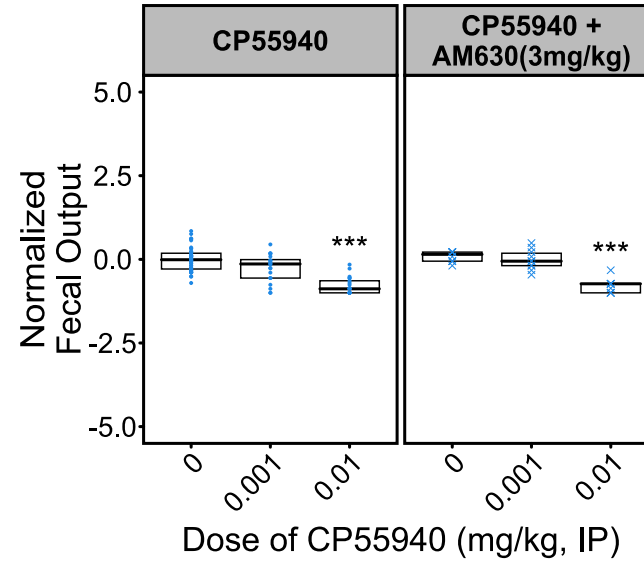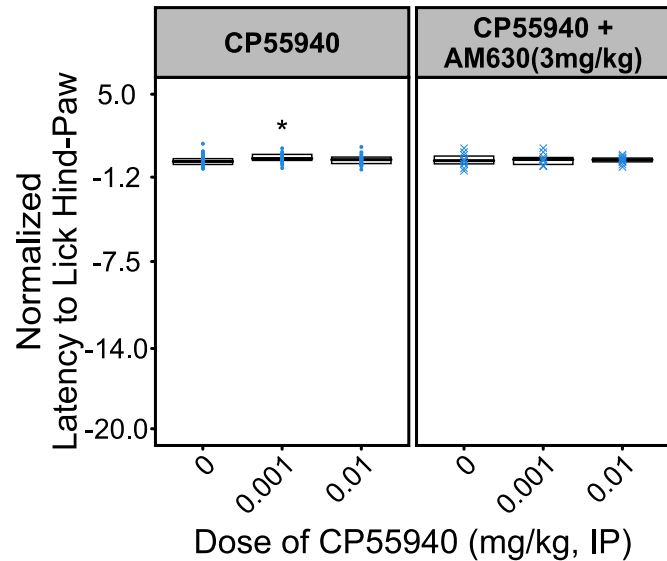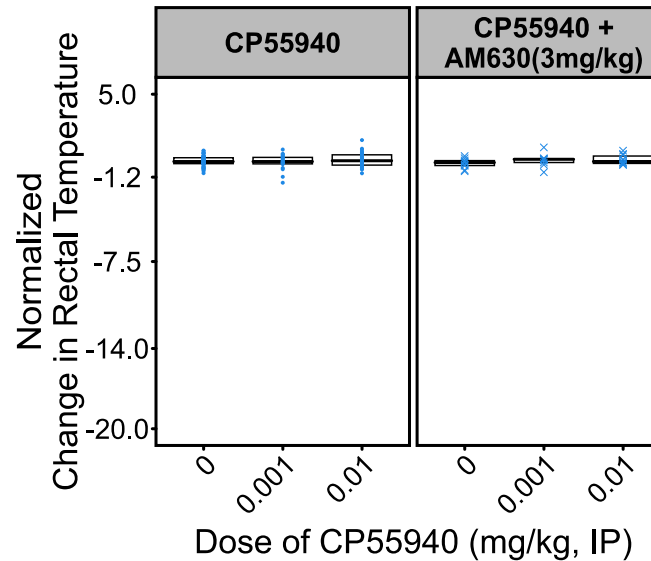



# Supplemental Figure 5 - Sample Sizes

## Sample Sizes in Figure 1

| Dose         | Sex        | Distance_30m_Total |     | Fecal_Output |     | Pain_Latency_Hot_Plate |     | Pain_Latency_Tail_Water |     | Temp_Rectal_Change |     | Temp_IR_Change |     |
|--------------|------------|--------------------|-----|--------------|-----|------------------------|-----|-------------------------|-----|--------------------|-----|----------------|-----|
|              |            | Young              | Old | Young        | Old | Young                  | Old | Young                   | Old | Young              | Old | Young          | Old |
| <b>0</b>     | <b>All</b> | 73                 | 56  | 68           | 52  | 73                     | 56  | 28                      | 40  | 73                 | 56  | 71             | 56  |
| <b>0.001</b> | <b>All</b> | 32                 | 23  | 32           | 23  | 32                     | 23  | 12                      | 12  | 32                 | 23  | 32             | 22  |
| <b>0.01</b>  | <b>All</b> | 38                 | 29  | 33           | 24  | 38                     | 29  | 12                      | 11  | 38                 | 28  | 35             | 29  |
| <b>0.1</b>   | <b>All</b> | 23                 | 15  | 15           | 9   | 23                     | 15  | 8                       | 10  | 23                 | 13  | 20             | 15  |
| <b>0.4</b>   | <b>All</b> | 13                 | 13  | 8            | 7   | 13                     | 14  | 8                       | 9   | 13                 | 14  | 11             | 14  |
| <b>0.8</b>   | <b>All</b> | 22                 | 26  | 17           | 21  | 23                     | 26  | 19                      | 22  | 23                 | 25  | 21             | 26  |

## Sample Sizes in Figure 2

## Sample Sizes in Figure 3

| Measure     |              | Distance_30m_Total |                |               |                | Fecal_Output  |                |               |                | Pain_Latency_Hot_Plate |                |               |                | Temp_Rectal_Change |                |               |                |
|-------------|--------------|--------------------|----------------|---------------|----------------|---------------|----------------|---------------|----------------|------------------------|----------------|---------------|----------------|--------------------|----------------|---------------|----------------|
| Dose Group  |              | CP55940 Alone      | CP55940+ AM251 | CP55940 Alone | CP55940+ AM251 | CP55940 Alone | CP55940+ AM251 | CP55940 Alone | CP55940+ AM251 | CP55940 Alone          | CP55940+ AM251 | CP55940 Alone | CP55940+ AM251 | CP55940 Alone      | CP55940+ AM251 | CP55940 Alone | CP55940+ AM251 |
| Sex         | Dose         | Young              | Young          | Old           | Old            | Young         | Young          | Old           | Old            | Young                  | Young          | Old           | Old            | Young              | Young          | Old           | Old            |
| <b>Male</b> | <b>0</b>     | 51                 | 17             | 35            | 20             | 48            | 17             | 31            | 20             | 53                     | 14             | 35            | 20             | 53                 | 17             | 35            | 18             |
| <b>Male</b> | <b>0.001</b> | 20                 | 10             | 11            | 10             | 20            | 10             | 11            | 10             | 20                     | 10             | 11            | 10             | 20                 | 10             | 11            | 10             |
| <b>Male</b> | <b>0.01</b>  | 26                 | 10             | 17            | 10             | 21            | 10             | 12            | 10             | 26                     | 10             | 17            | 10             | 26                 | 10             | 17            | 9              |
| <b>Male</b> | <b>0.8</b>   | 10                 | 8              | 12            | 10             | 7             | 8              | 10            | 10             | 11                     | 8              | 14            | 10             | 11                 | 8              | 14            | 10             |

# Supplemental Figure 6

## Effects of CP55940 on Peripheral Locomotion in the Open Field

### Young and Aged Male and Female

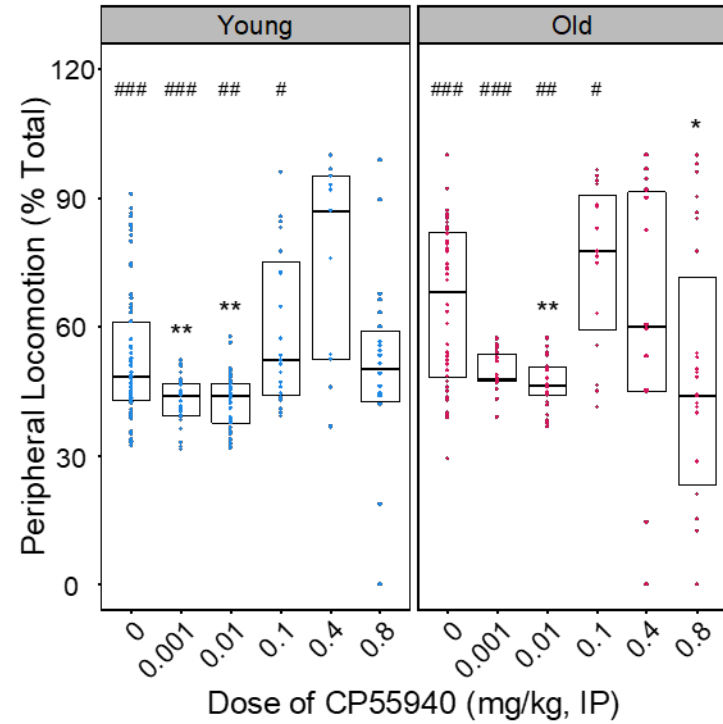

### Young Males

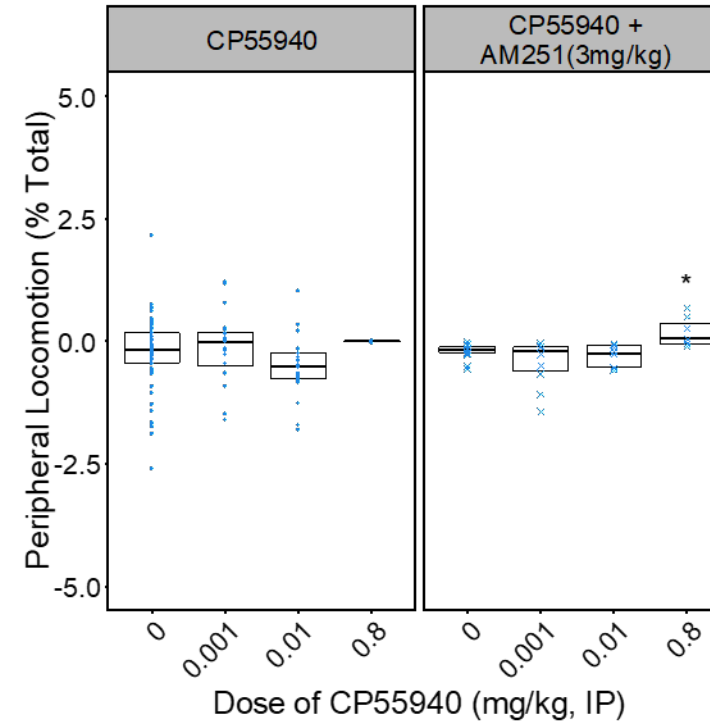

Supplement: MOESM1 [file 41514_2020_45_MOESM1_ESM.pdf]
